# Supplementary material
Source: publisher site journal article supplement (https://www.dovepress.com/article/236266)
Supplement: Supplementary file 1 [file get_supplementary_file.php]

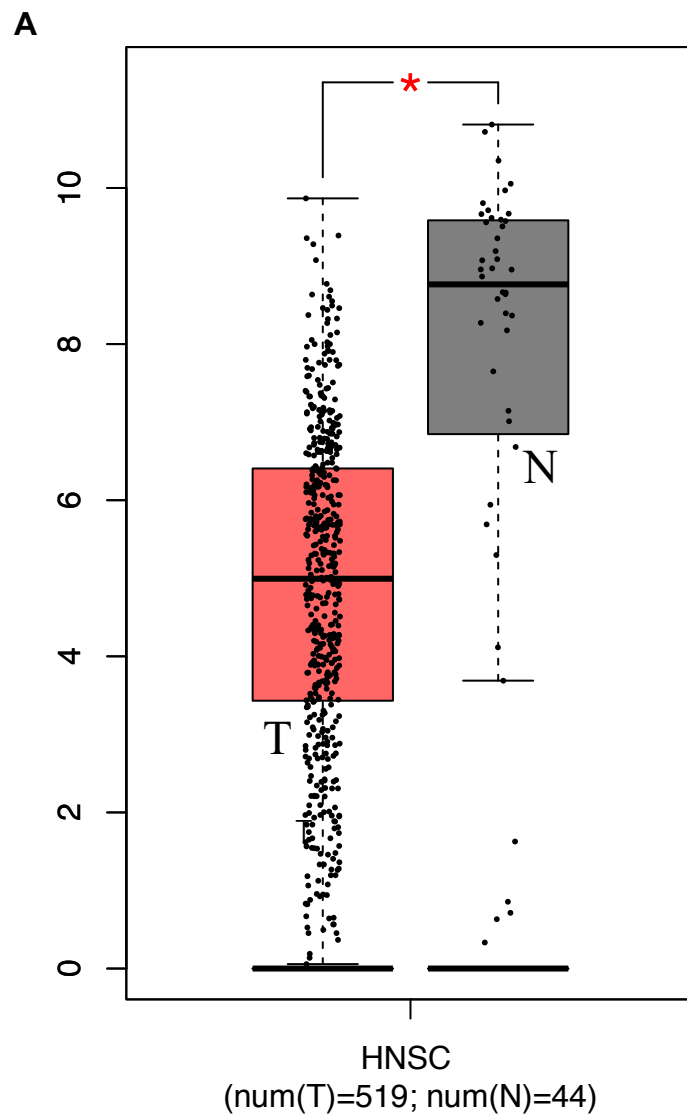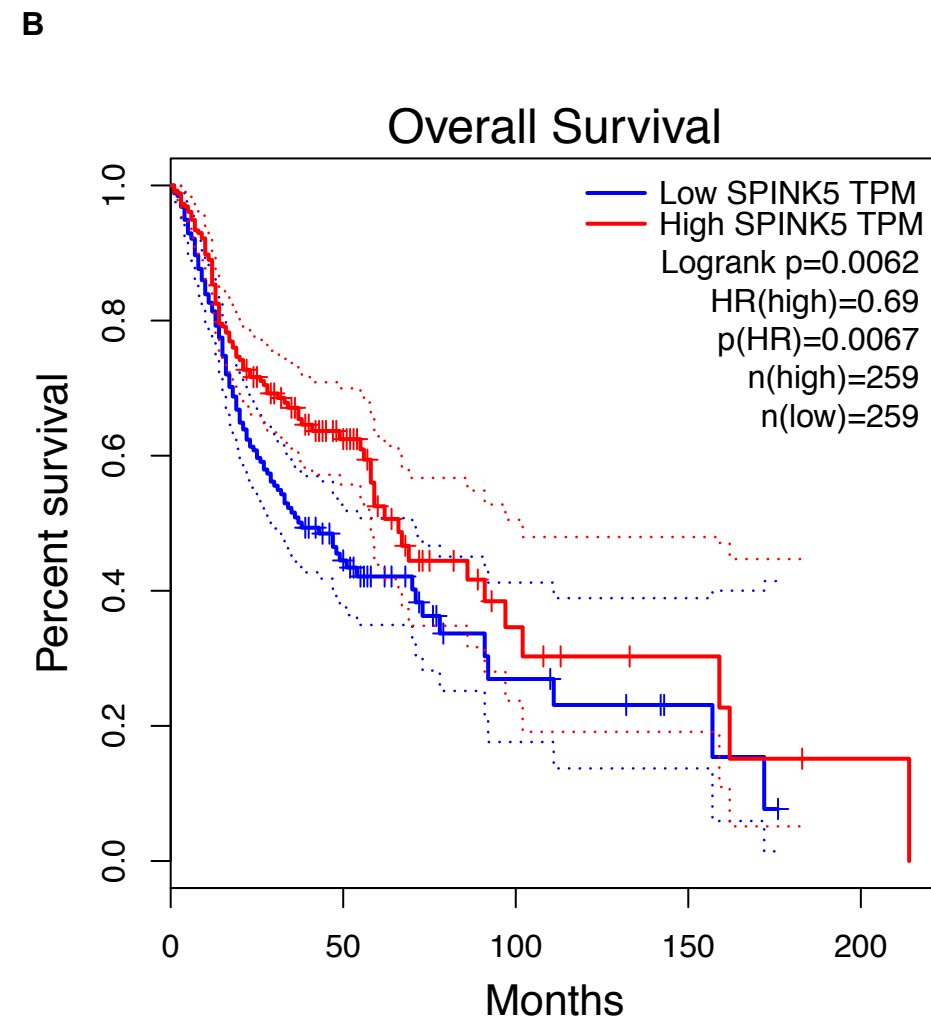

Supplementary Figure-1 legend: SPINK5 is significantly downregulated in HNSCC. **A**, The expression of SPINK5 was analyzed by bioinformatics in GEPIA database, T: tumor, N: nontumor, \*:  $P<0.05$ ; **B**, The relationship of SPINK5 expression with overall survival percentage of HNSCC patients was analyzed by bioinformatics in GEPIA database.
